# Supplementary material
Source: MDPI journal article supplement (https://www.mdpi.com/2073-8994/13/11/2131)
Supplement: s1 [file s1]

## Supplementary Materials

Taimin Yang <sup>1</sup>, Steve Waitschat <sup>2</sup>, Andrew Kentaro Inge <sup>1</sup>, Norbert Stock <sup>2</sup>, Xiaodong Zou <sup>1,\*</sup> and Hongyi Xu <sup>1,\*</sup>

<sup>1</sup> Department of Materials and Environmental Chemistry, Stockholm University, 106 91 Stockholm, Sweden;

<sup>2</sup> Institut für Anorganische Chemie, Christian-Albrechts-Universität zu Kiel, 241 18 Kiel, Germany;

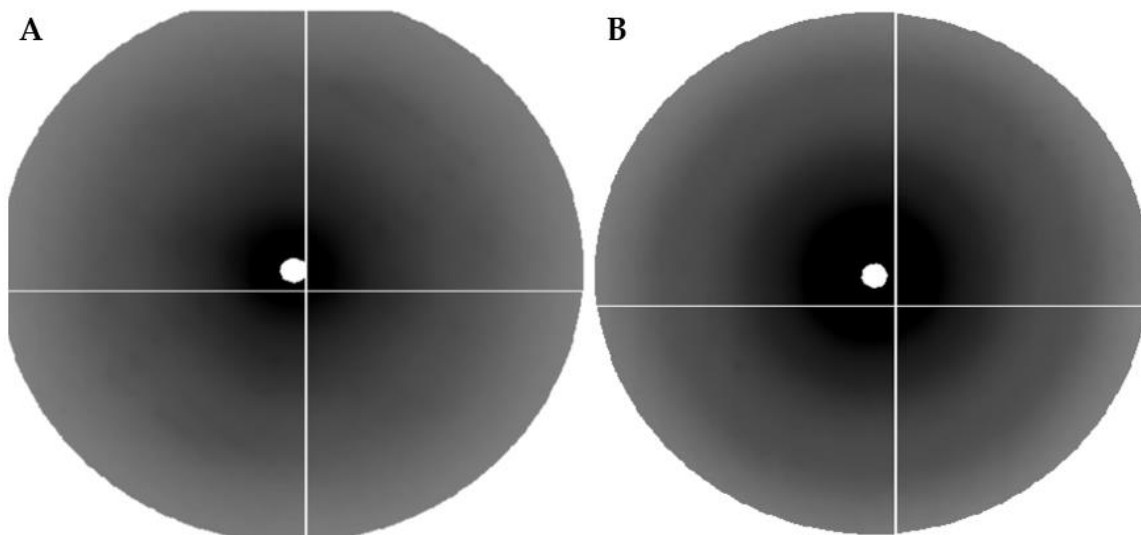

**Figure S1.** Estimated background by XDS of sucrose data collected at A) room temperature and B) cryogenic temperature.

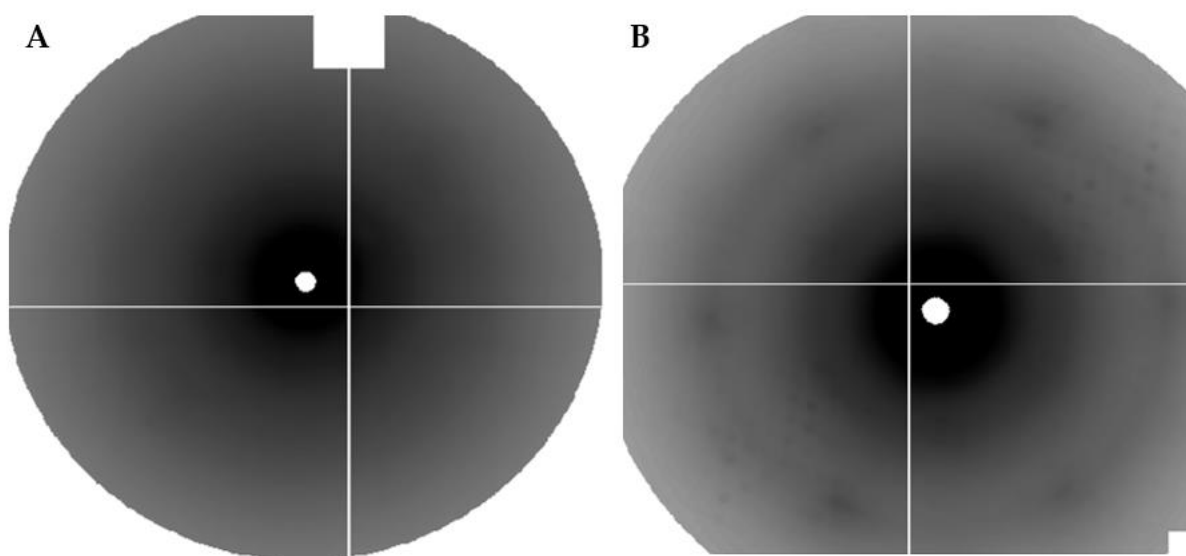

**Figure S2.** Estimated background by XDS of H<sub>4</sub>ABTC data collected at A) room temperature and B) cryogenic temperature.

**Table S1.** ADRA of hydrogen atoms between the reference structure of sucrose [1] and structures determined from datasets obtained in both temperature conditions (2nd round of refinements for obtaining the best possible structure models).

| Atom Label     | ADRA (Å)       | Atom Label     | ADRA (Å)        |
|----------------|----------------|----------------|-----------------|
| ~300 K         |                | ~100 K         |                 |
| H1             | 0.146          | H1             | 0.200           |
| H2             | 0.177          | H2             | 0.176           |
| H3             | 0.072          | H3             | 0.172           |
| H4             | 0.177          | H4             | 0.167           |
| H5             | 0.199          | H5             | 0.196           |
| H6             | 0.110          | H6             | 0.136           |
| H7             | 0.317          | H7             | 0.395           |
| H10            | 0.088          | H8             | 0.313           |
| H11            | 0.077          | H10            | 0.033           |
| H12            | 0.156          | H11            | 0.088           |
| H13            | 0.366          | H12            | 0.136           |
| H14            | 0.138          | H13            | 0.481           |
| H15            | 0.229          | H15            | 0.000           |
| H16            | 0.088          | H16            | 0.365           |
| H17            | 0.143          | H17            | 0.152           |
| H18            | 0.152          | H18            | 0.123           |
| H19            | 0.203          | H19            | 0.181           |
| H20            | 0.142          | H20            | 0.151           |
| H21            | 0.192          | H21            | 0.172           |
| H22            | 0.185          | H22            | 0.142           |
| <b>Average</b> | <b>0.17(9)</b> | <b>Average</b> | <b>0.20(11)</b> |

**Table S2.** Comparison between the ADPs of sucrose determined from merged datasets (refinement for obtaining better structure). ADPs close to 0.01 (the minimum ADP value set by “XNPD”) are marked in red.

| Atom Label     | ADP (Å <sup>2</sup> ) | Atom Label     | ADP (Å <sup>2</sup> ) |
|----------------|-----------------------|----------------|-----------------------|
| ~300 K         |                       | ~100 K         |                       |
| C1             | 0.038                 | C1             | 0.010                 |
| C2             | 0.038                 | C2             | 0.017                 |
| C3             | 0.051                 | C3             | 0.025                 |
| C4             | 0.034                 | C4             | 0.012                 |
| C5             | 0.062                 | C5             | 0.021                 |
| C6             | 0.038                 | C6             | 0.011                 |
| C7             | 0.055                 | C7             | 0.015                 |
| C8             | 0.041                 | C8             | 0.014                 |
| C9             | 0.056                 | C9             | 0.010                 |
| C10            | 0.043                 | C10            | 0.015                 |
| C11            | 0.071                 | C11            | 0.014                 |
| C12            | 0.060                 | C12            | 0.023                 |
| O1             | 0.031                 | O1             | 0.017                 |
| O2             | 0.052                 | O2             | 0.028                 |
| O3             | 0.061                 | O3             | 0.027                 |
| O4             | 0.046                 | O4             | 0.018                 |
| O5             | 0.092                 | O5             | 0.033                 |
| O6             | 0.046                 | O6             | 0.014                 |
| O7             | 0.119                 | O7             | 0.033                 |
| O8             | 0.058                 | O8             | 0.028                 |
| O9             | 0.045                 | O9             | 0.016                 |
| O10            | 0.077                 | O10            | 0.027                 |
| O11            | 0.064                 | O11            | 0.021                 |
| <b>Average</b> | <b>0.056(20)</b>      | <b>Average</b> | <b>0.019(7)</b>       |

## References

1. Brown, G.M.; Levy, H.A. Further Refinement of the Structure of Sucrose Based on Neutron-Diffraction Data. *Acta Cryst B* **1973**, *29*, 790–797, doi:10.1107/S0567740873003353.
